# Supplementary material for: A new molybdenum(V) nickel phosphate based on divacant [H30(MoV16O32)Ni14(PO4)26O2(OH)4(H2O)8]12− wheel
Source: Royal Society of Chemistry journal article supplement (doi:10.1039/b905277a), 2009-01-01
Supplement: b905277a.pdf [file b905277a.pdf]

## Electronic Supplementary Information

### A New Molybdenum(V) Nickel Phosphate Based on Divacant

### $[\text{H}_{30}(\text{Mo}^{\text{V}}_{16}\text{O}_{32})\text{Ni}_{14}(\text{PO}_4)_{26}\text{O}_2(\text{OH})_4(\text{H}_2\text{O})_8]^{12-}$ Wheel

Yu-Nan Zhang,<sup>a,d</sup> Bai-Bin Zhou,<sup>\*a,b</sup> Yang-Guang Li,<sup>\*c</sup> Zhan-Hua Su,<sup>a,b</sup> and Zhi-Feng Zhao<sup>a</sup>

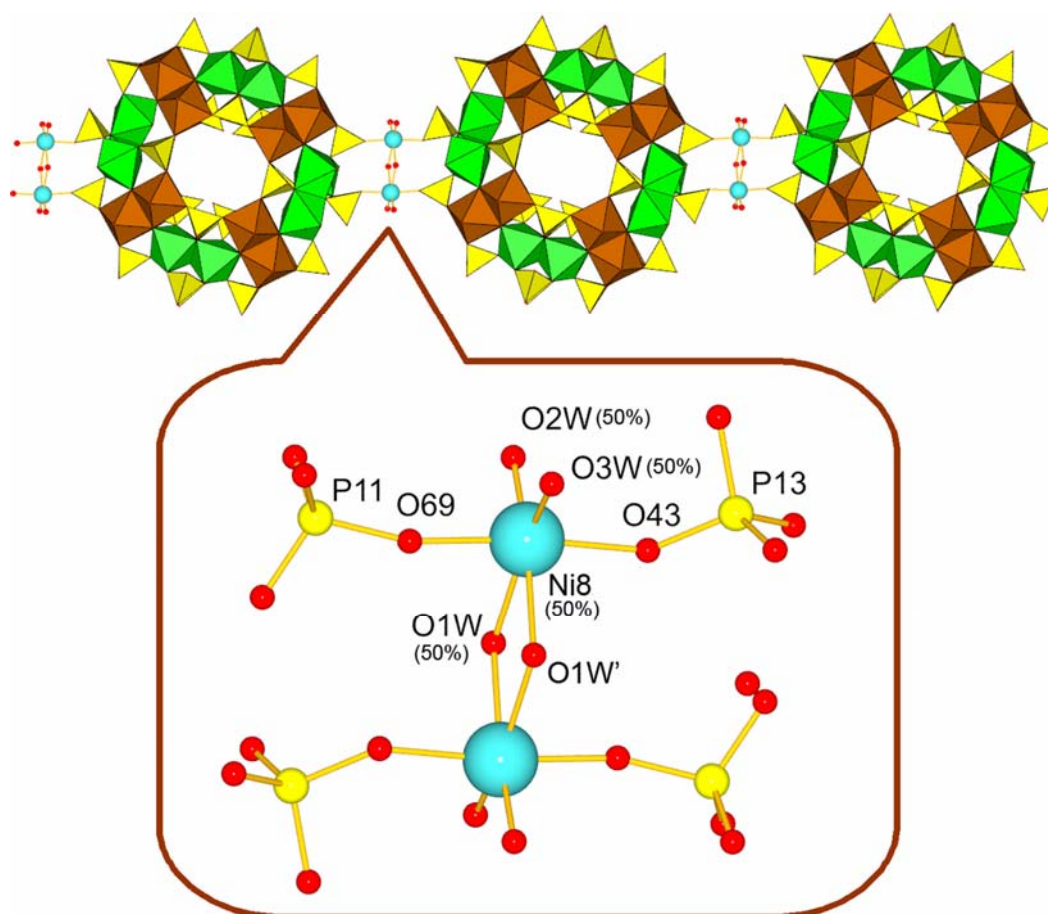

**Fig. S1** View of 1-D chainlike structural feature of **1** composed of the wheel-type polyoxoanions and the  $[\text{Ni}(\text{H}_2\text{O})_3]^{2+}$  linkers. In such a linker, the Ni8 atom and its three coordinated water molecules all exhibit a 50% of site-occupancy disorder. The occupancies are shown in the parentheses. Color code: brown octahedra,  $\{\text{MoO}_6\}$ ; green octahedra,  $\{\text{NiO}_6\}$ ; yellow tetrahedra,  $\{\text{PO}_4\}$ , blue ball, Ni center; yellow ball, P atom; red ball, O atom. The bond distances of Ni(8)-O are in the range of 1.954(6)~2.123(2) Å.

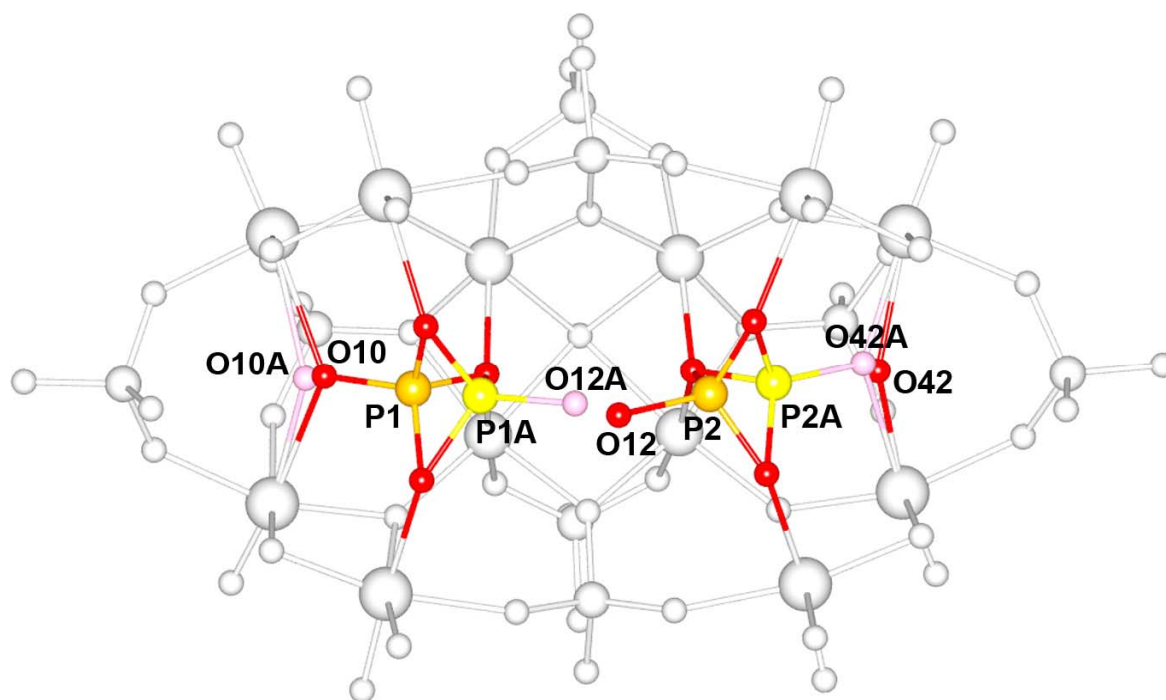

**Fig. S2** View of the two-fold disordered  $\{P(1)O_4\}$ ,  $\{P(2)O_4\}$ , O10 and O42 units in the polyoxoanion of **1**. The orange  $\{P(1)O_4\}$ ,  $\{P(2)O_4\}$  units and the red O10 and O42 linker possess 82% site occupancies, while the yellow  $\{P(1A)O_4\}$  and  $\{P(2A)O_4\}$  units and the pink O10A and O42A linkers possess 18 % site occupancies, respectively.

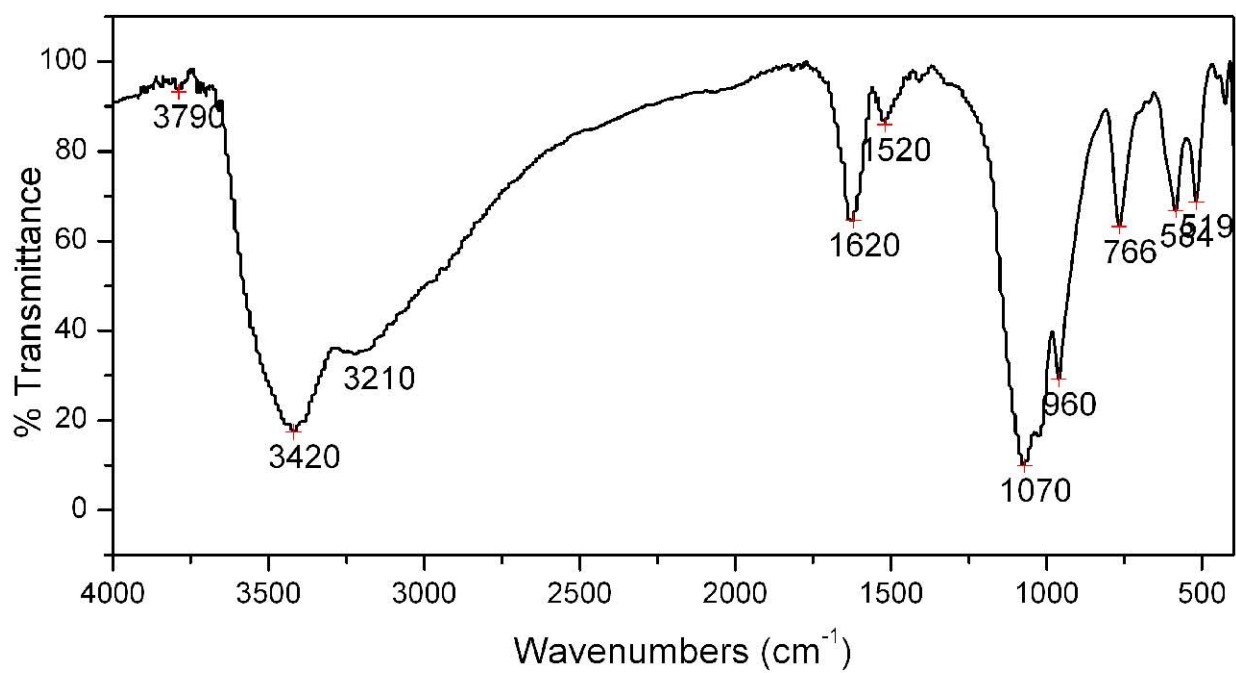

**Fig. S3** IR spectrum of **1**

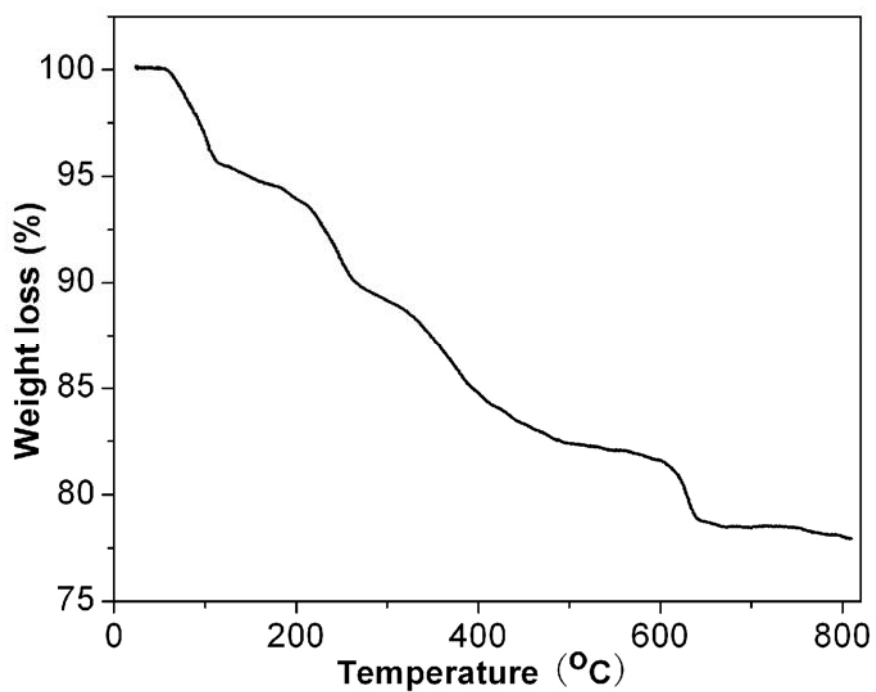

**Fig. S4** TG curve of **1**

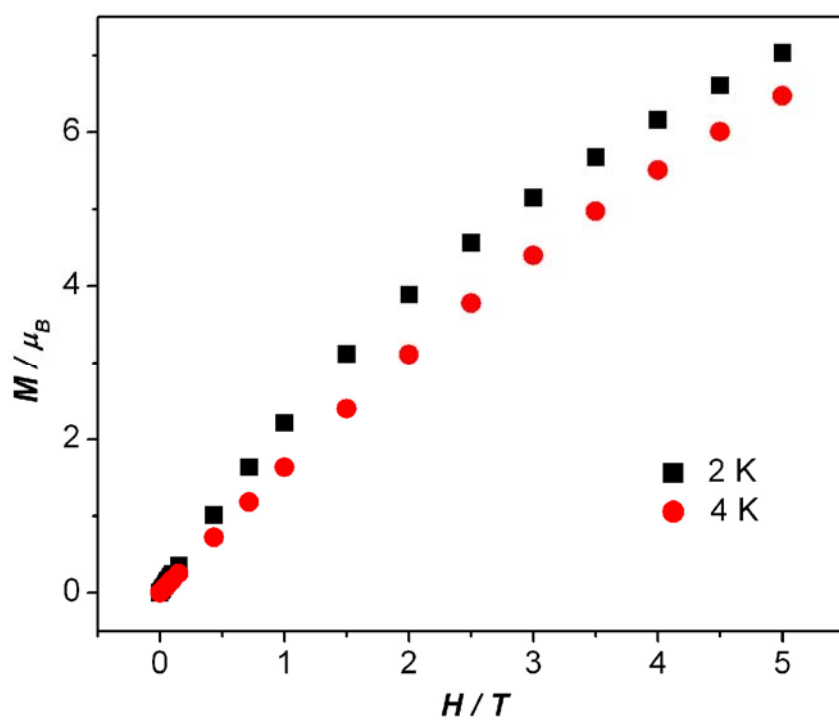

**Fig. S5**  $M$  vs  $H$  curve of **1**
